# Supplementary material for: Indole Diterpenes from Mangrove Sediment-Derived Fungus Penicillium sp. UJNMF0740 Protect PC12 Cells against 6-OHDA-Induced Neurotoxicity via Regulating the PI3K/Akt Pathway
Source: MDPI journal article supplement (doi:10.3390/md21110593), 2023-11-14

***Supporting information for***

**Indole-diterpenes from Mangrove Sediment-Derived Fungus  
*Penicillium* sp. UJNMF0740 Protect PC12 Cells against  
6-OHDA-Induced Neurotoxicity via Regulating the PI3K/Akt  
Pathway**

Xin-Xin Wang<sup>†</sup>, Ze-Long Chen<sup>†</sup>, Jun-Sheng Zhang, Haishan Liu, Ruo-Ping Ma, Xin-Ping Liu,  
Ming-Yue Li, Di Ge, Jie Bao\*, Hua Zhang\*

*School of Biological Science and Technology, University of Jinan, 336 West Road of Nan Xinzhuang,  
Jinan 250022, China*

\* Correspondence: bio\_baoj@ujn.edu.cn (J.B.); bio\_zhangh@ujn.edu.cn (H.Z.);

Tel.: 86-0531-89736199

<sup>†</sup> These authors contributed equally to this work.

## Table of contents

|                                                                                                          |            |
|----------------------------------------------------------------------------------------------------------|------------|
| <b>Figure S1.</b> The $^1\text{H}$ -NMR spectrum of compound <b>1</b> in $\text{CDCl}_3$                 | <b>P1</b>  |
| <b>Figure S2.</b> The $^{13}\text{C}$ -NMR spectrum of compound <b>1</b> in $\text{CDCl}_3$              | <b>P1</b>  |
| <b>Figure S3.</b> The HSQC spectrum of compound <b>1</b> in $\text{CDCl}_3$                              | <b>P2</b>  |
| <b>Figure S4.</b> The $^1\text{H}$ - $^1\text{H}$ COSY spectrum of compound <b>1</b> in $\text{CDCl}_3$  | <b>P2</b>  |
| <b>Figure S5.</b> The HMBC spectrum of compound <b>1</b> in $\text{CDCl}_3$                              | <b>P3</b>  |
| <b>Figure S6.</b> The NOESY spectrum of compound <b>1</b> in $\text{CDCl}_3$                             | <b>P3</b>  |
| <b>Figure S7.</b> The (+)-HR-ESIMS spectrum of compound <b>1</b>                                         | <b>P4</b>  |
| <b>Figure S8.</b> The $^1\text{H}$ -NMR spectrum of compound <b>2</b> in $\text{CDCl}_3$                 | <b>P4</b>  |
| <b>Figure S9.</b> The $^{13}\text{C}$ -NMR spectrum of compound <b>2</b> in $\text{CDCl}_3$              | <b>P5</b>  |
| <b>Figure S10.</b> The HSQC spectrum of compound <b>2</b> in $\text{CDCl}_3$                             | <b>P5</b>  |
| <b>Figure S11.</b> The $^1\text{H}$ - $^1\text{H}$ COSY spectrum of compound <b>2</b> in $\text{CDCl}_3$ | <b>P6</b>  |
| <b>Figure S12.</b> The HMBC spectrum of compound <b>2</b> in $\text{CDCl}_3$                             | <b>P6</b>  |
| <b>Figure S13.</b> The NOESY spectrum of compound <b>2</b> in $\text{CDCl}_3$                            | <b>P7</b>  |
| <b>Figure S14.</b> The (+)-HR-ESIMS spectrum of compound <b>2</b>                                        | <b>P7</b>  |
| <b>Figure S15.</b> The $^1\text{H}$ -NMR spectrum of compound <b>3</b> in $\text{CDCl}_3$                | <b>P8</b>  |
| <b>Figure S16.</b> The $^{13}\text{C}$ -NMR spectrum of compound <b>3</b> in $\text{CDCl}_3$             | <b>P8</b>  |
| <b>Figure S17.</b> The HSQC spectrum of compound <b>3</b> in $\text{CDCl}_3$                             | <b>P9</b>  |
| <b>Figure S18.</b> The $^1\text{H}$ - $^1\text{H}$ COSY spectrum of compound <b>3</b> in $\text{CDCl}_3$ | <b>P9</b>  |
| <b>Figure S19.</b> The HMBC spectrum of compound <b>3</b> in $\text{CDCl}_3$                             | <b>P10</b> |
| <b>Figure S20.</b> The NOESY spectrum of compound <b>3</b> in $\text{CDCl}_3$                            | <b>P10</b> |
| <b>Figure S21.</b> The (+)-HR-ESIMS spectrum of compound <b>3</b>                                        | <b>P11</b> |
| <b>Figure S22.</b> The $^1\text{H}$ -NMR spectrum of compound <b>4</b> in $\text{CDCl}_3$                | <b>P11</b> |
| <b>Figure S23.</b> The $^{13}\text{C}$ -NMR spectrum of compound <b>4</b> in $\text{CDCl}_3$             | <b>P12</b> |
| <b>Figure S24.</b> The HSQC spectrum of compound <b>4</b> in $\text{CDCl}_3$                             | <b>P12</b> |
| <b>Figure S25.</b> The $^1\text{H}$ - $^1\text{H}$ COSY spectrum of compound <b>4</b> in $\text{CDCl}_3$ | <b>P13</b> |
| <b>Figure S26.</b> The HMBC spectrum of compound <b>4</b> in $\text{CDCl}_3$                             | <b>P13</b> |
| <b>Figure S27.</b> The NOESY spectrum of compound <b>4</b> in $\text{CDCl}_3$                            | <b>P14</b> |
| <b>Figure S28.</b> The (+)-HR-ESIMS spectrum of compound <b>4</b>                                        | <b>P14</b> |

**Figure S1.** The  $^1\text{H}$ -NMR spectrum of compound **1** in  $\text{CDCl}_3$

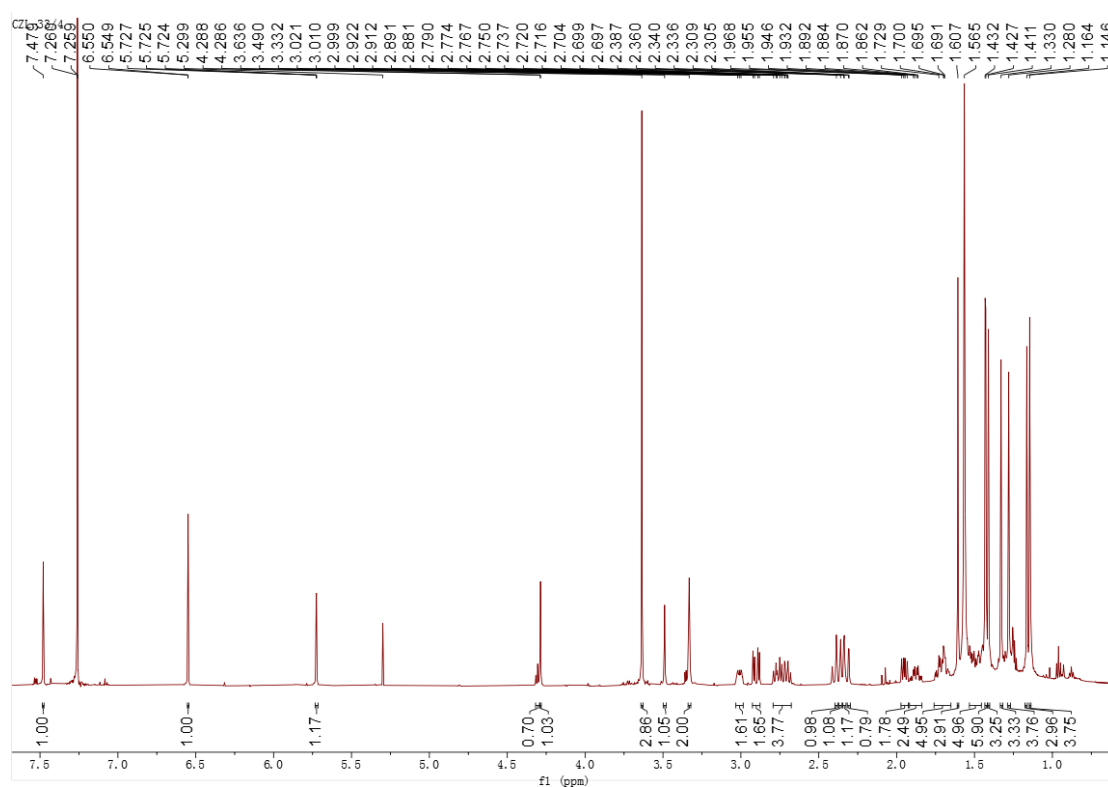

**Figure S2.** The  $^{13}\text{C}$ -NMR spectrum of compound **1** in  $\text{CDCl}_3$

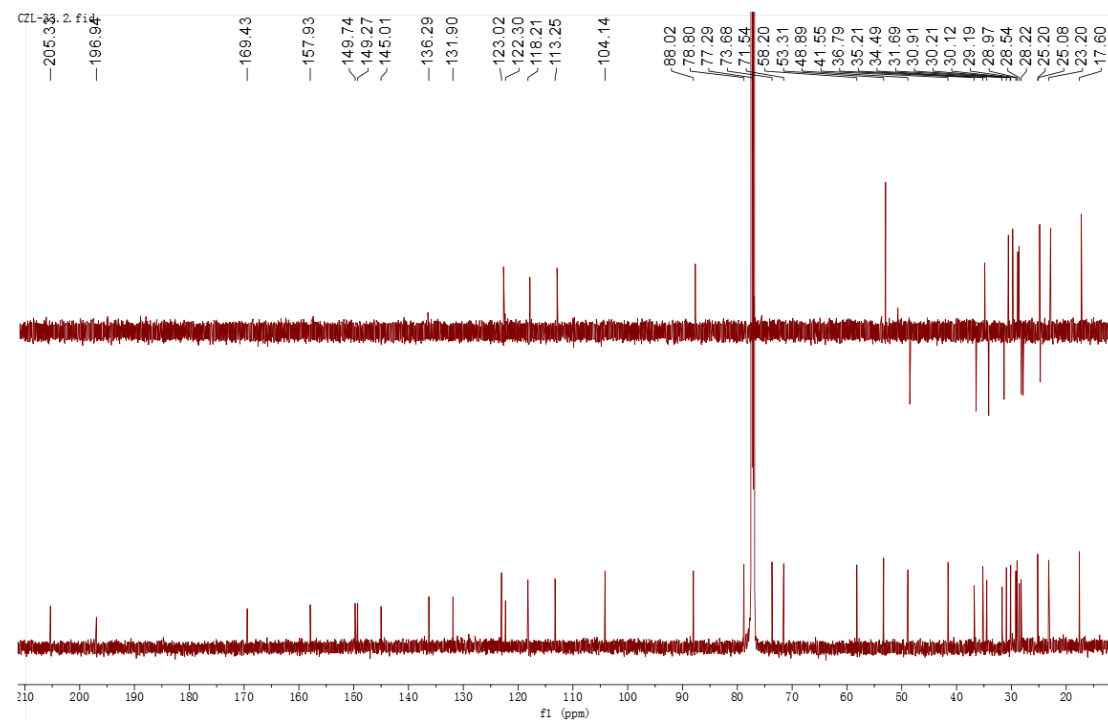

**Figure S3.** The HSQC spectrum of compound **1** in CDCl<sub>3</sub>

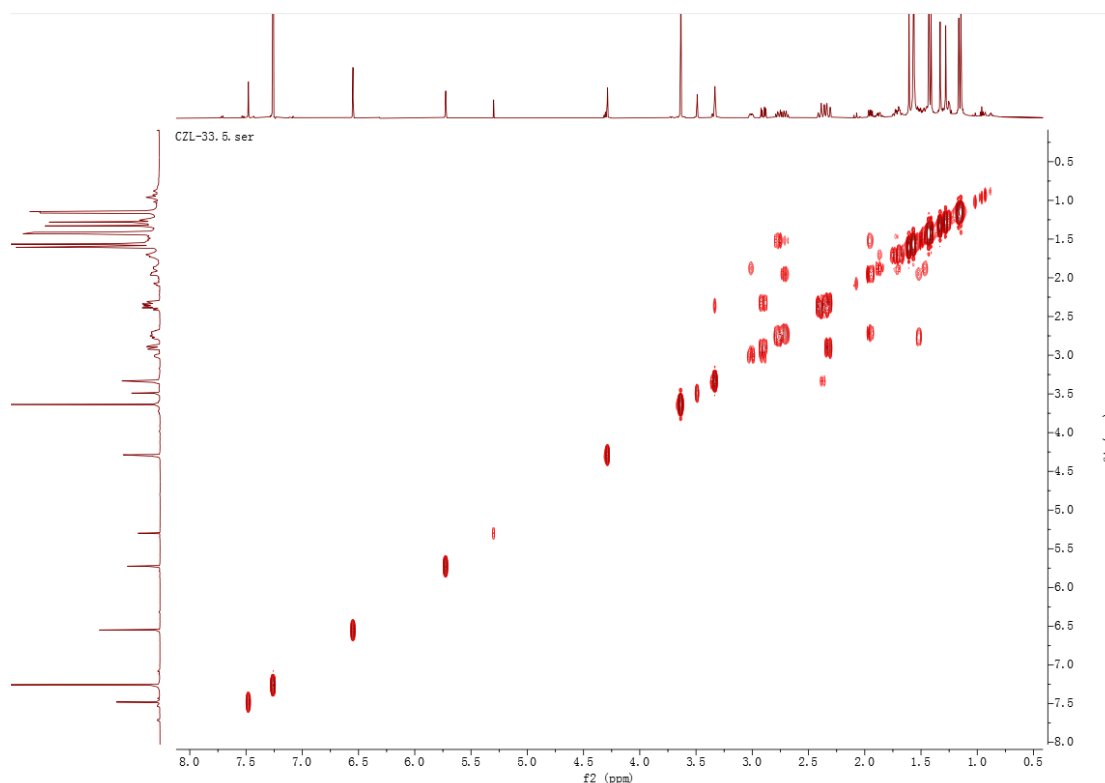

**Figure S4.** The <sup>1</sup>H-<sup>1</sup>H COSY spectrum of compound **1** in CDCl<sub>3</sub>

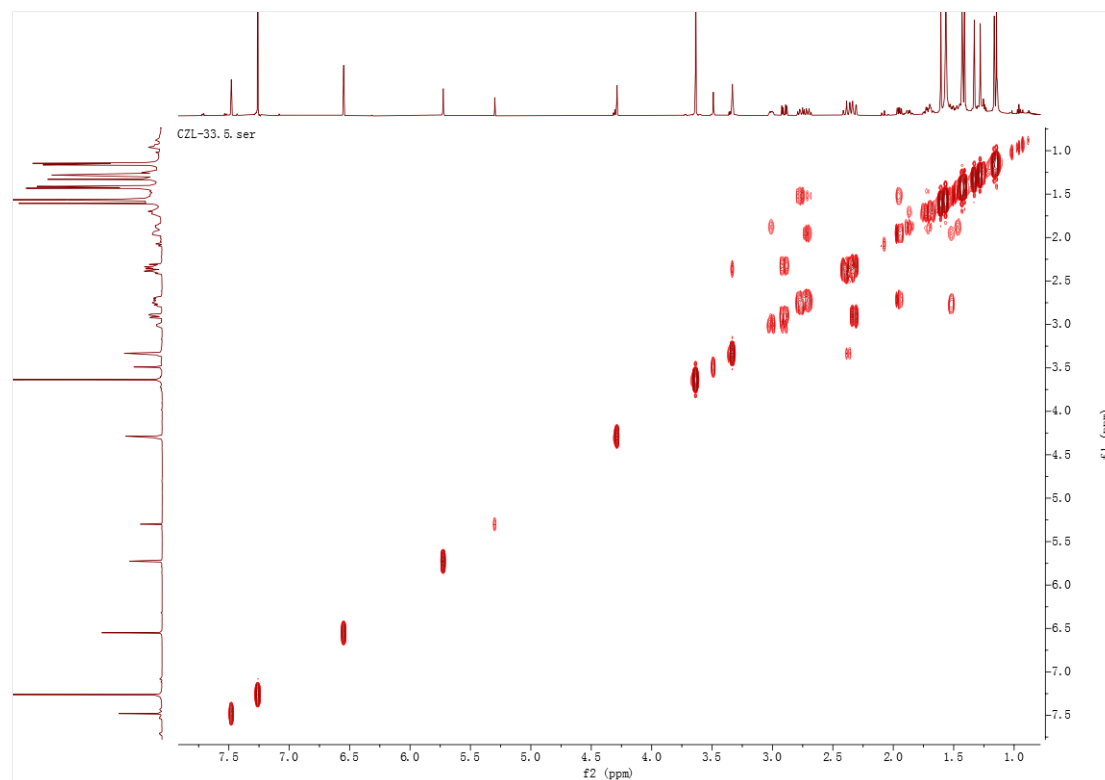

**Figure S5.** The HMBC spectrum of compound **1** in CDCl<sub>3</sub>

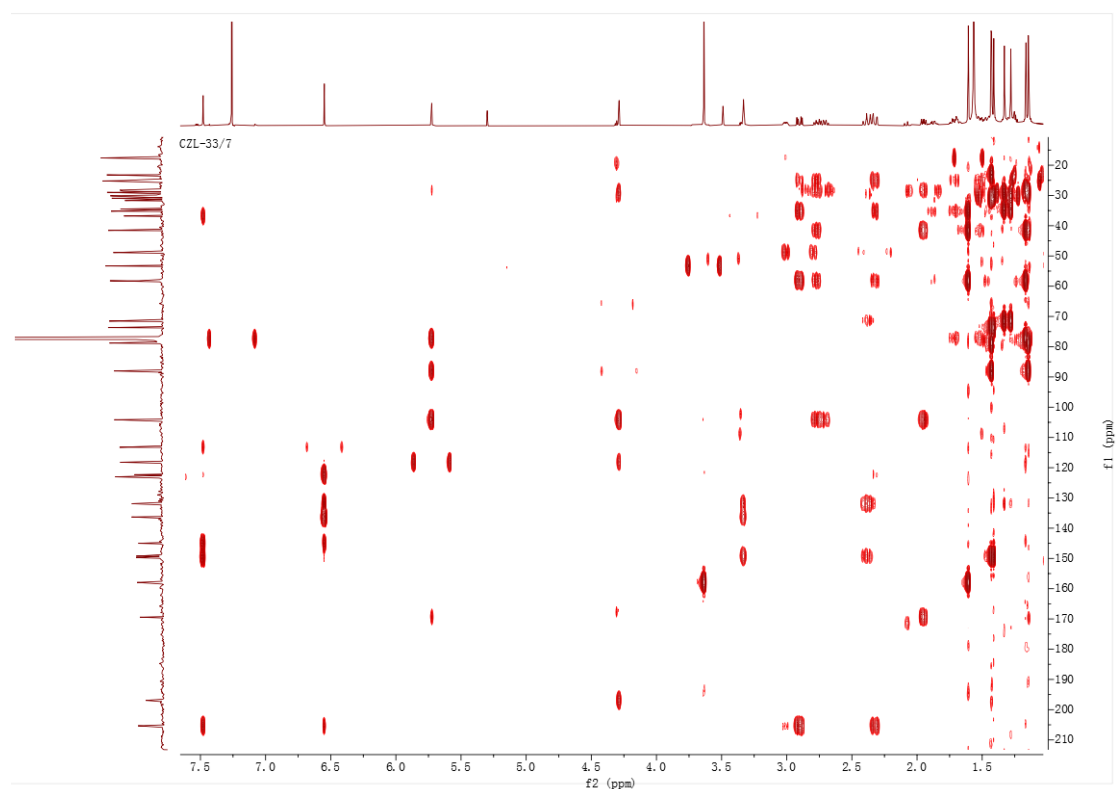

**Figure S6.** The NOESY spectrum of compound **1** in CDCl<sub>3</sub>

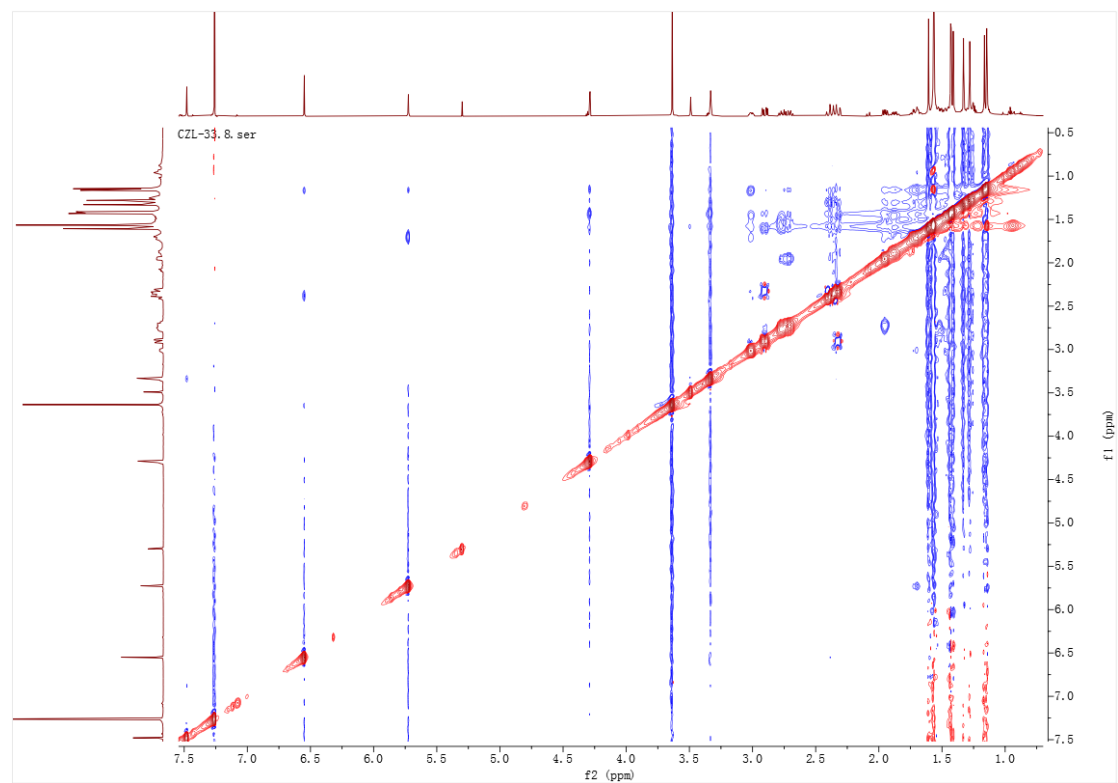

**Figure S7.** The (+)-HR-ESIMS spectrum of compound **1**

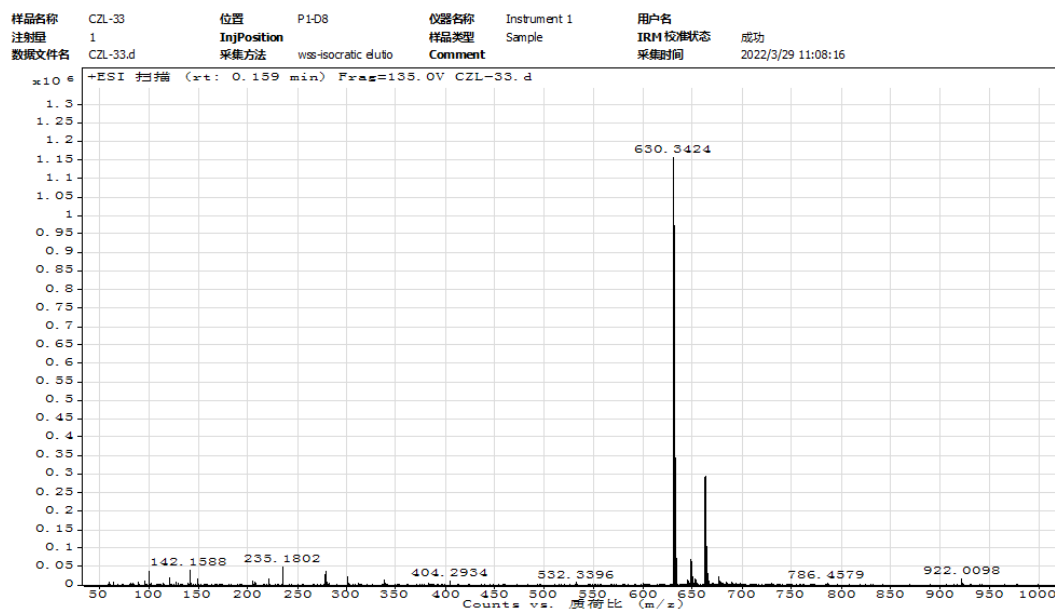

**Figure S8.** The  $^1\text{H}$ -NMR spectrum of compound **2** in  $\text{CDCl}_3$

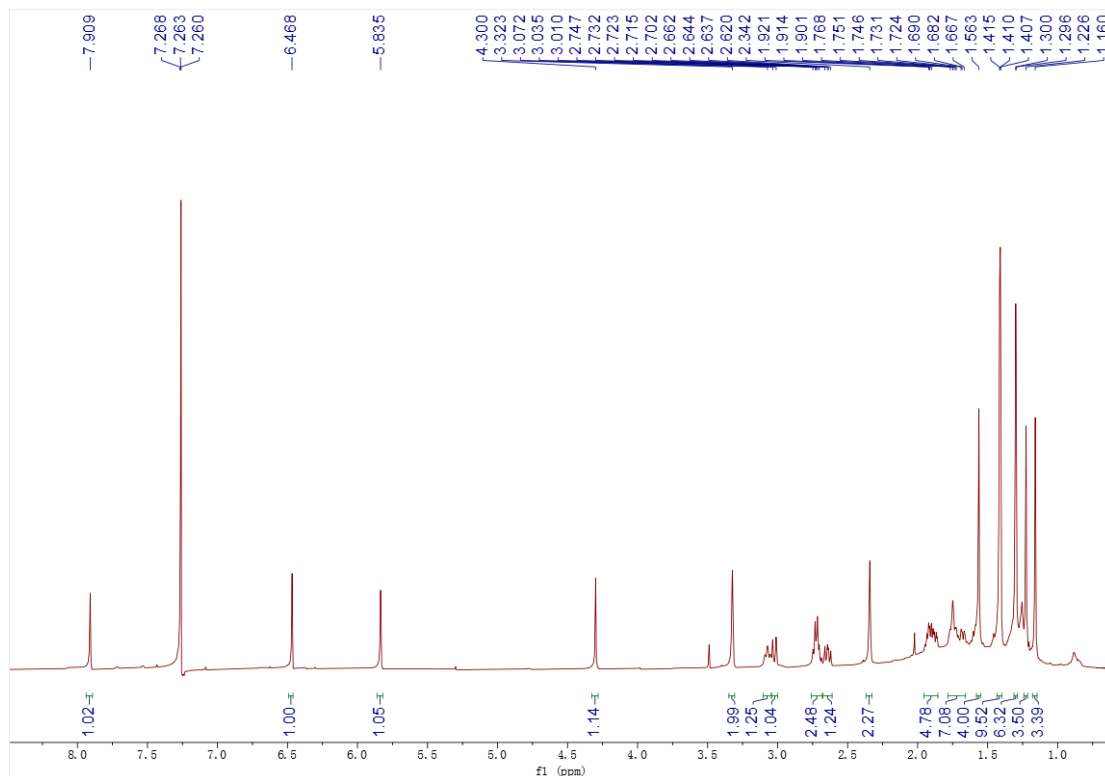

**Figure S9.** The  $^{13}\text{C}$ -NMR spectrum of compound **2** in  $\text{CDCl}_3$

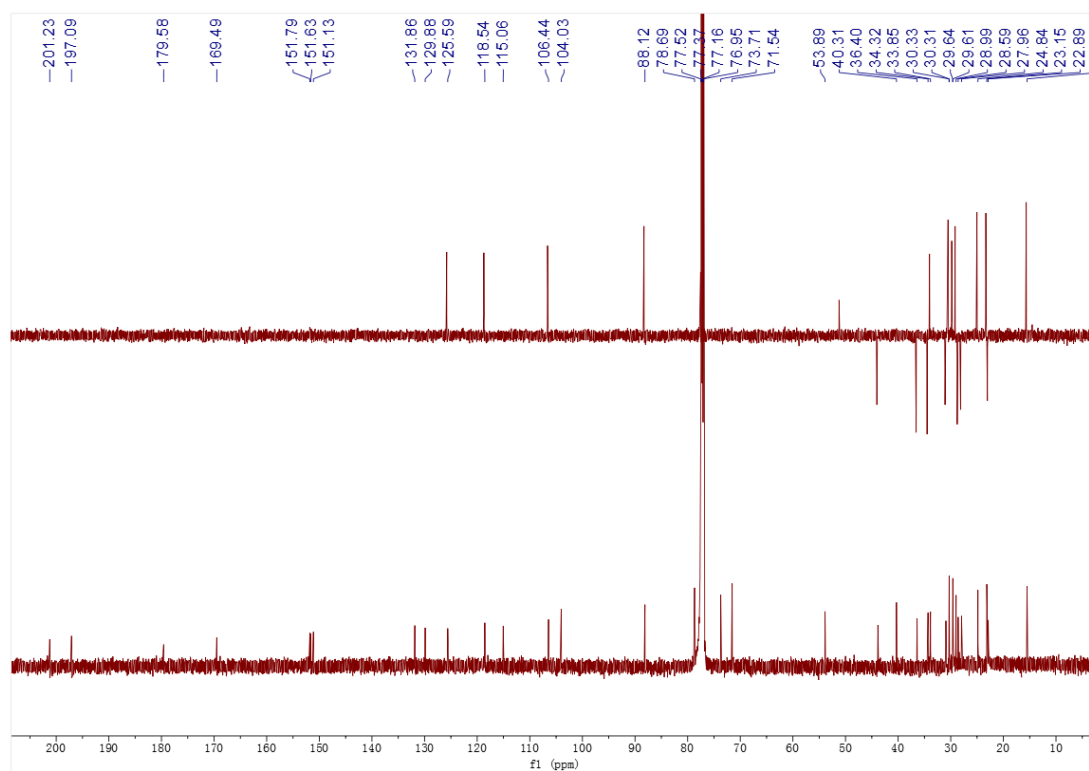

**Figure S10.** The HSQC spectrum of compound **2** in  $\text{CDCl}_3$

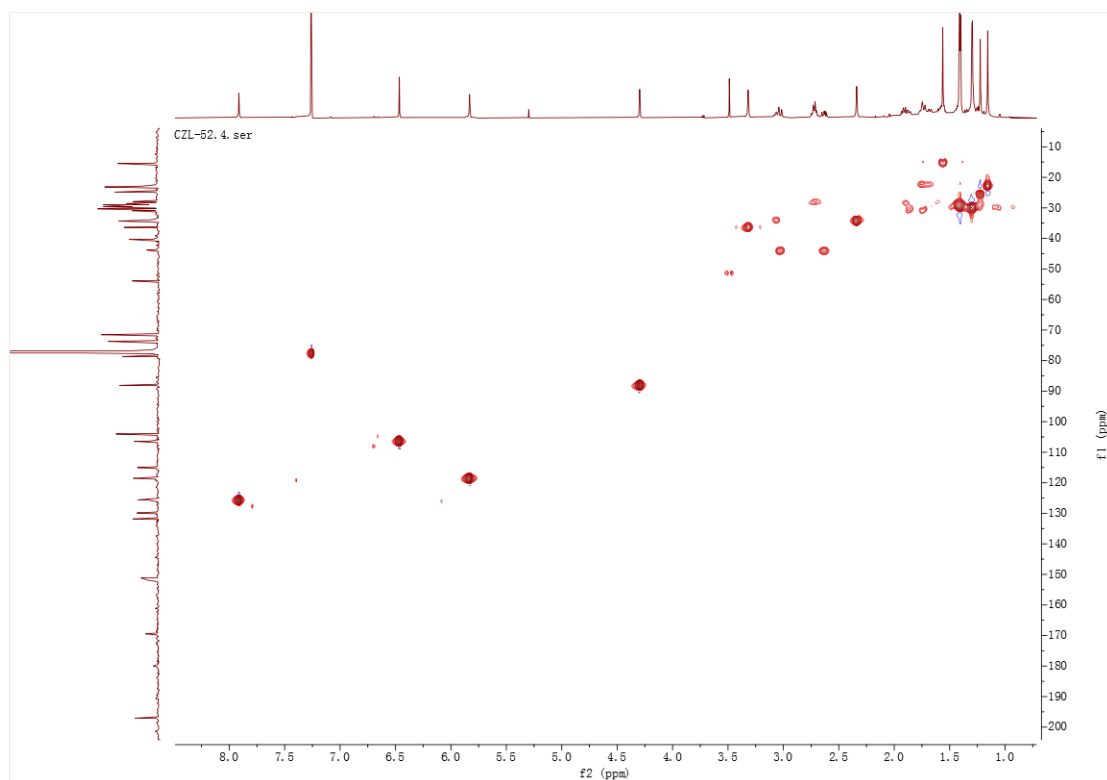

**Figure S11.** The  $^1\text{H}$ - $^1\text{H}$  COSY spectrum of compound **2** in  $\text{CDCl}_3$

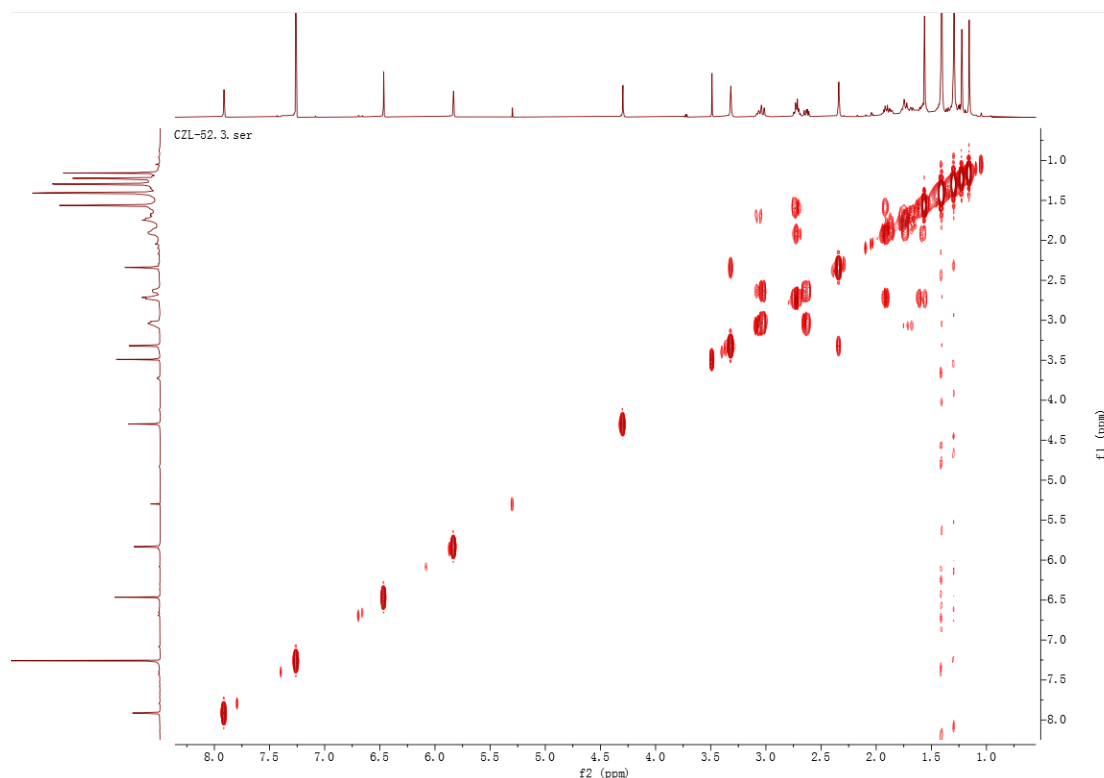

**Figure S12.** The HMBC spectrum of compound **2** in  $\text{CDCl}_3$

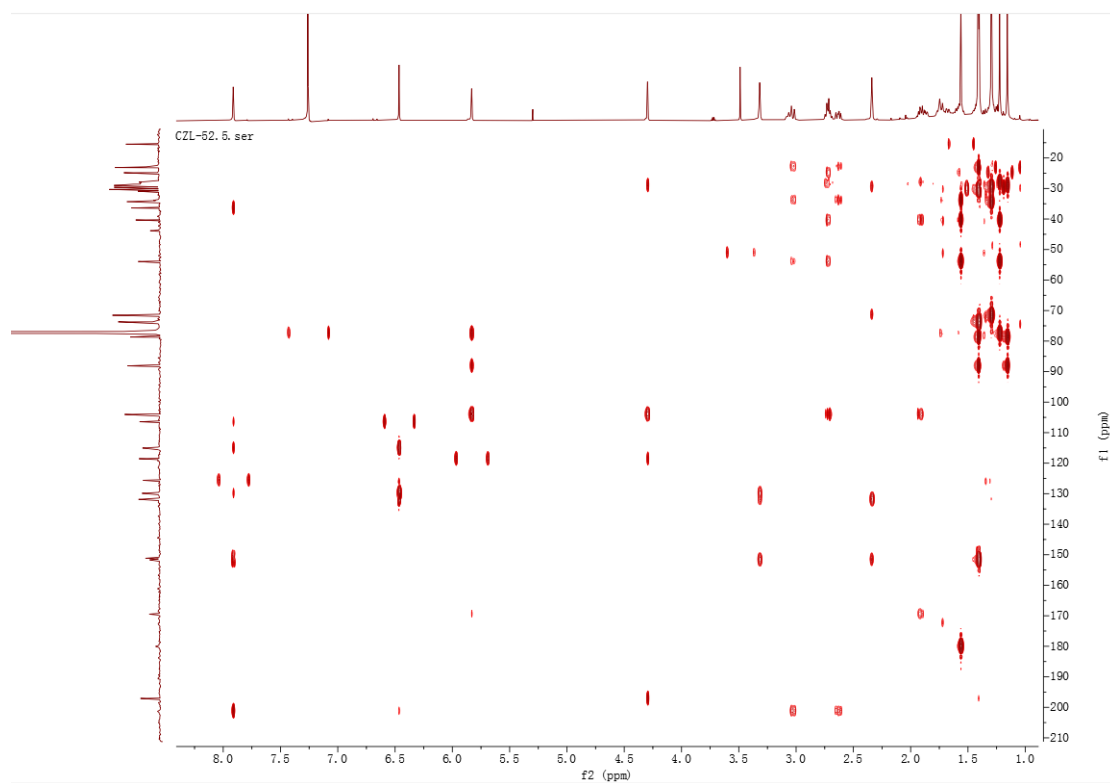



**Figure S13.** The NOESY spectrum of compound **2** in CDCl<sub>3</sub>

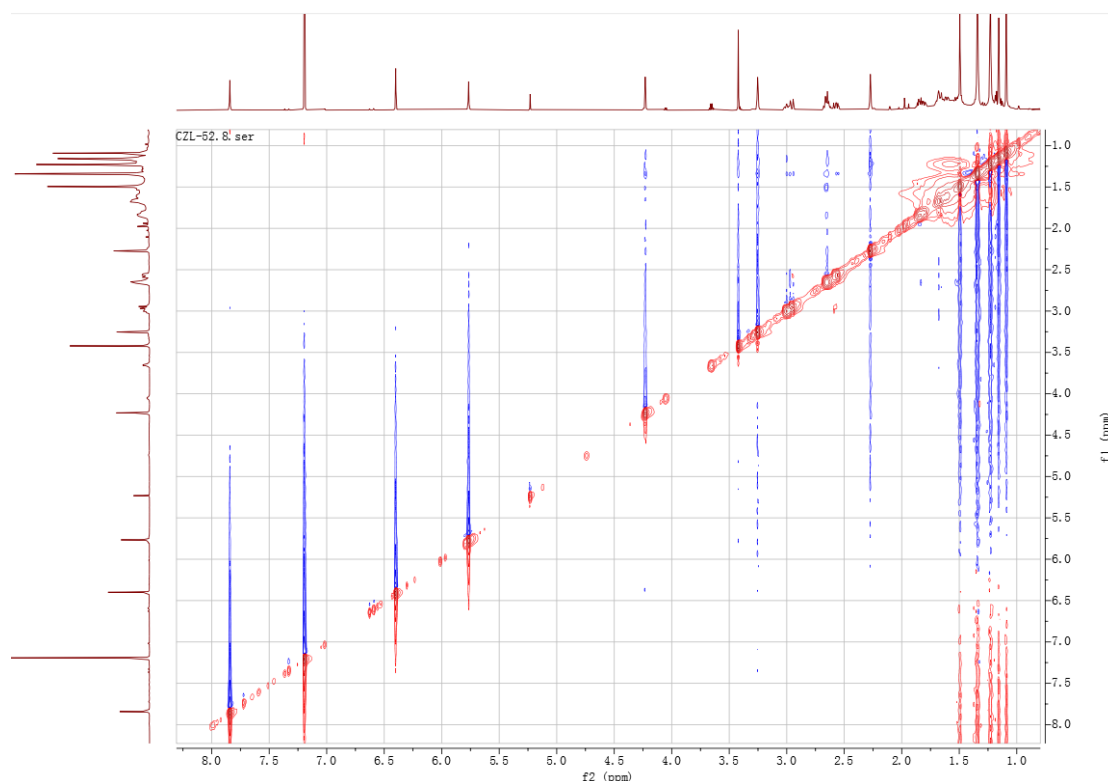

**Figure S14.** The (+)-HR-ESIMS spectrum of compound **2**

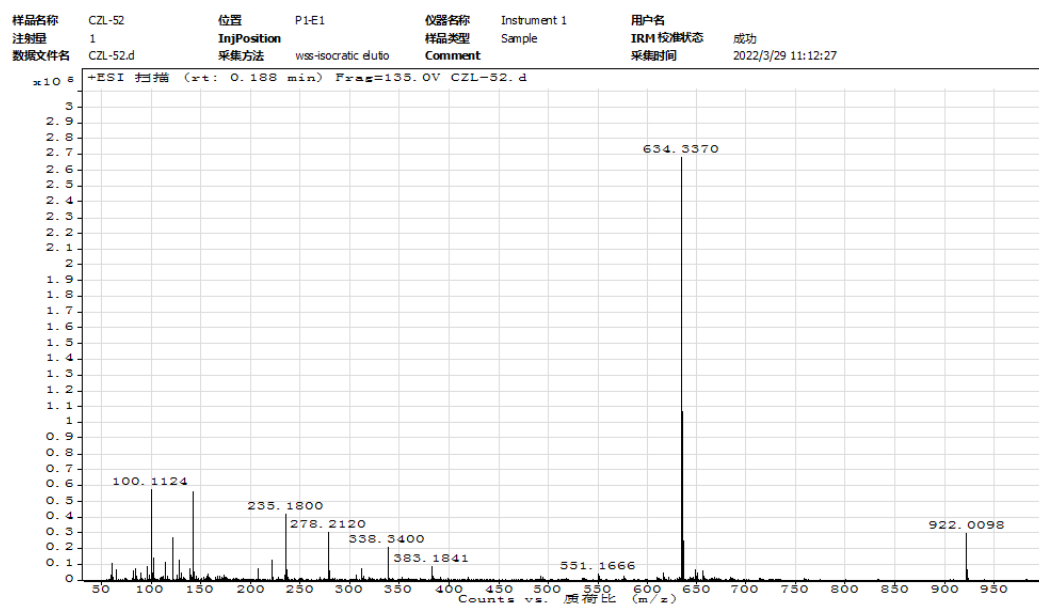

**Figure S15.** The  $^1\text{H}$ -NMR spectrum of compound **3** in  $\text{CDCl}_3$

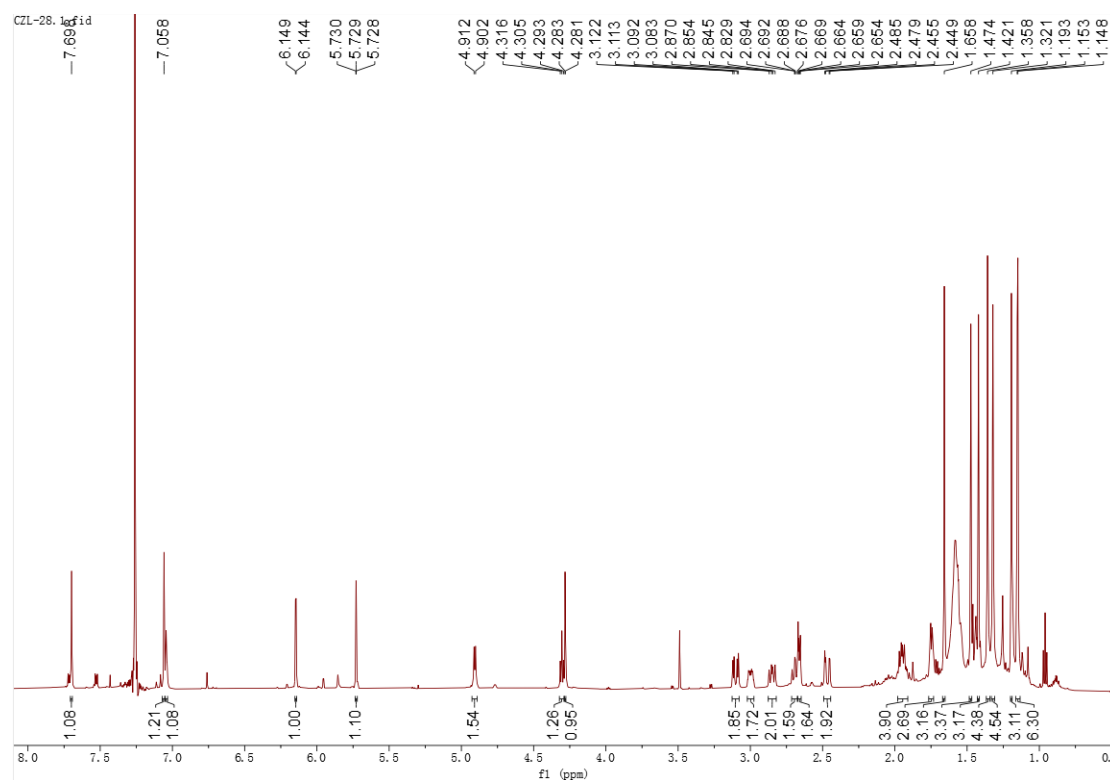

**Figure S16.** The  $^{13}\text{C}$ -NMR spectrum of compound **3** in  $\text{CDCl}_3$

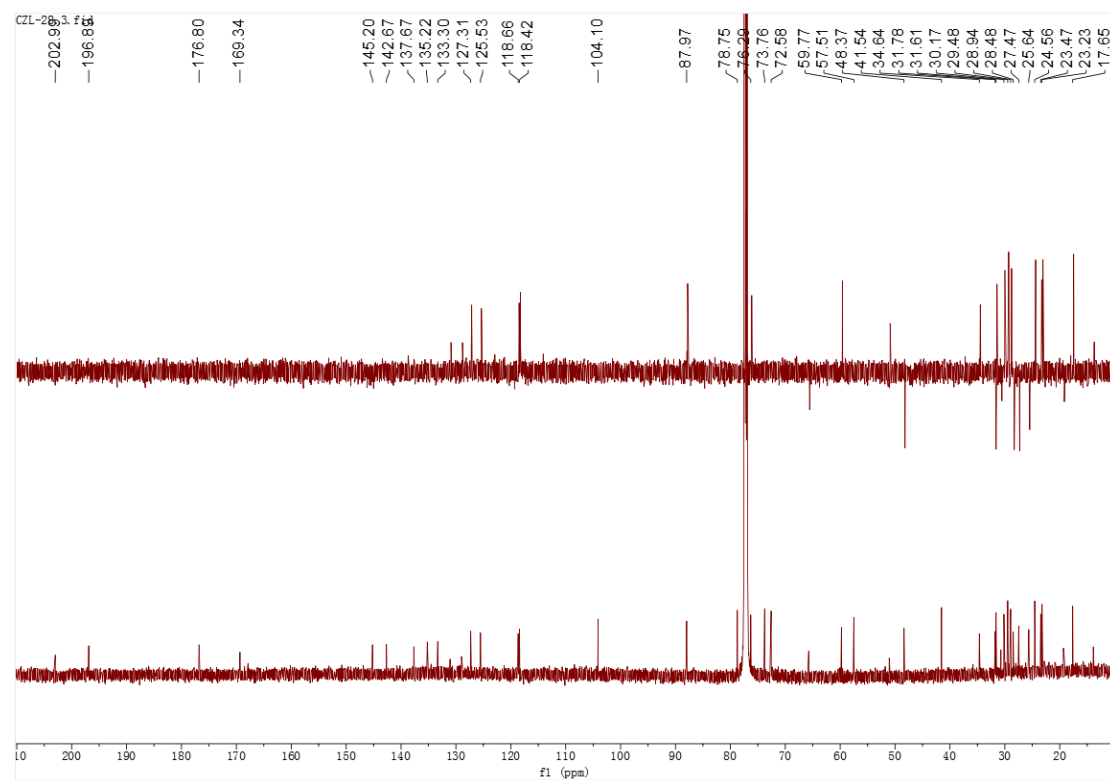

**Figure S17.** The HSQC spectrum of compound **3** in CDCl<sub>3</sub>

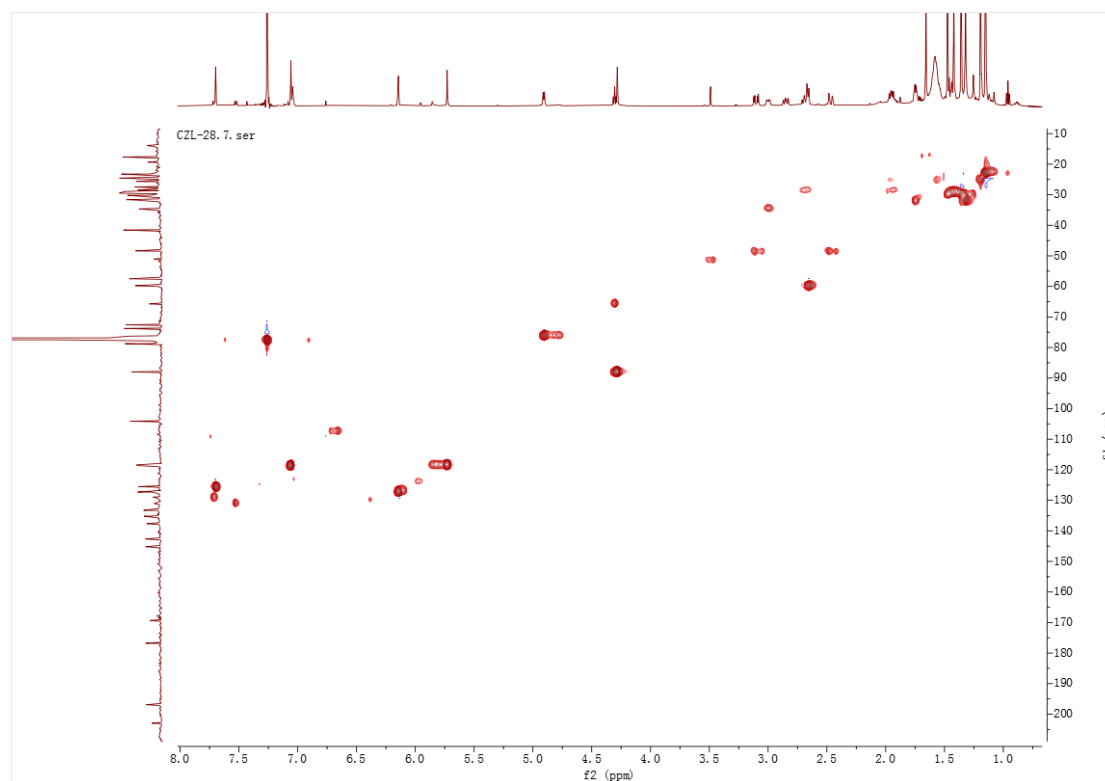

**Figure S18.** The <sup>1</sup>H-<sup>1</sup>H COSY spectrum of compound **3** in CDCl<sub>3</sub>

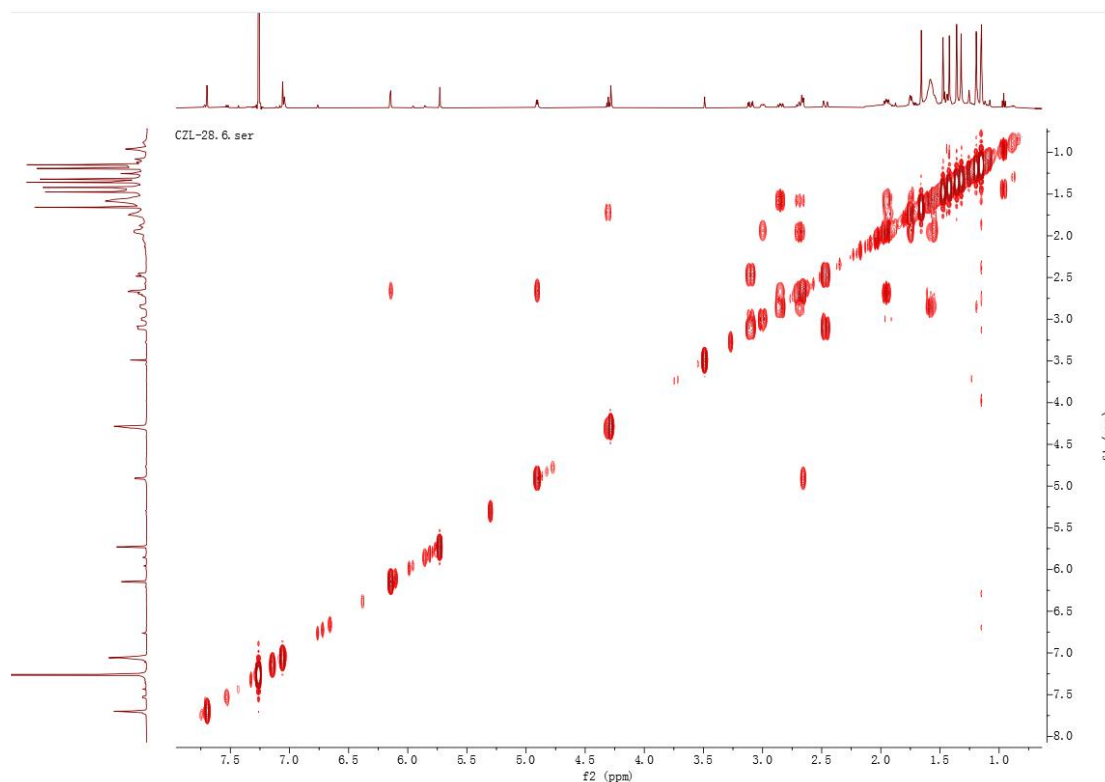

**Figure S19.** The HMBC spectrum of compound **3** in CDCl<sub>3</sub>

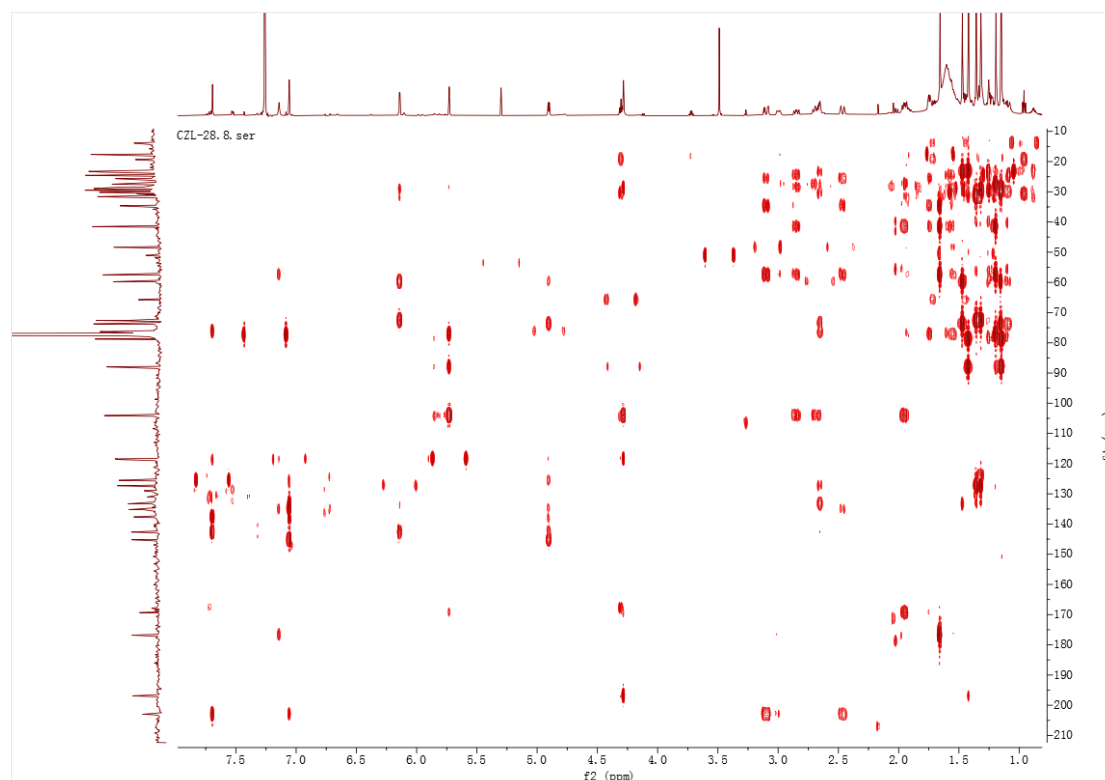

**Figure S20.** The NOESY spectrum of compound **3** in CDCl<sub>3</sub>

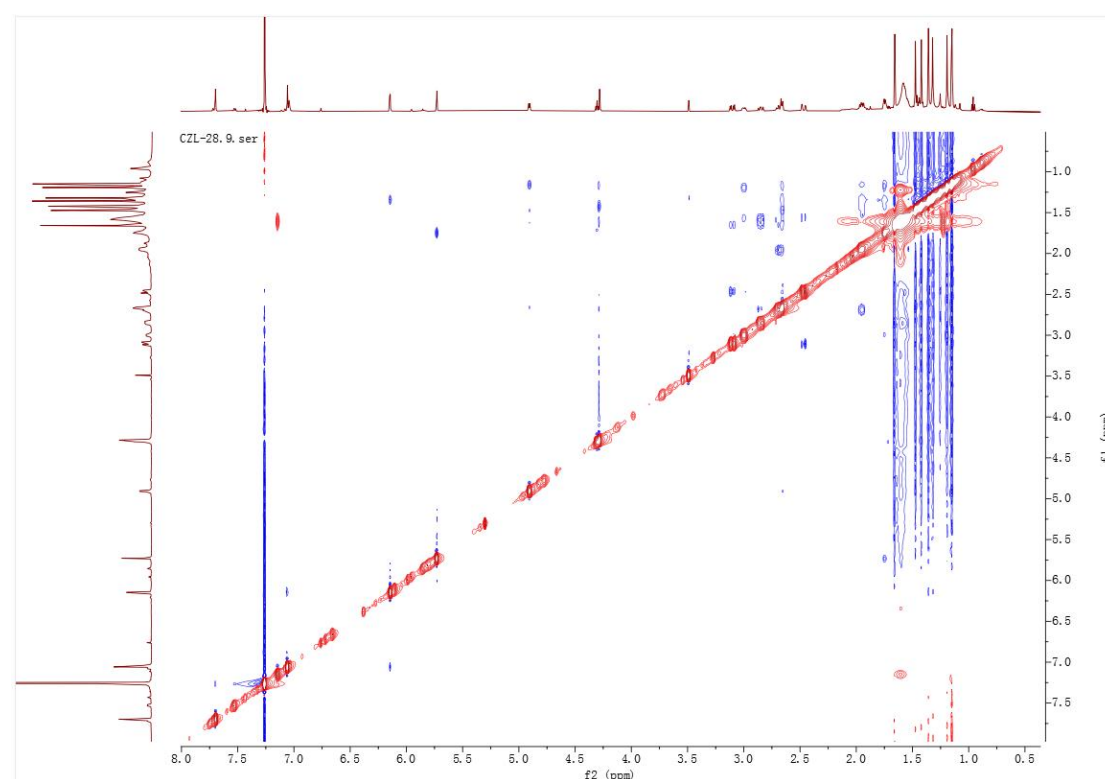

**Figure S21.** The (+)-HR-ESIMS spectrum of compound **3**

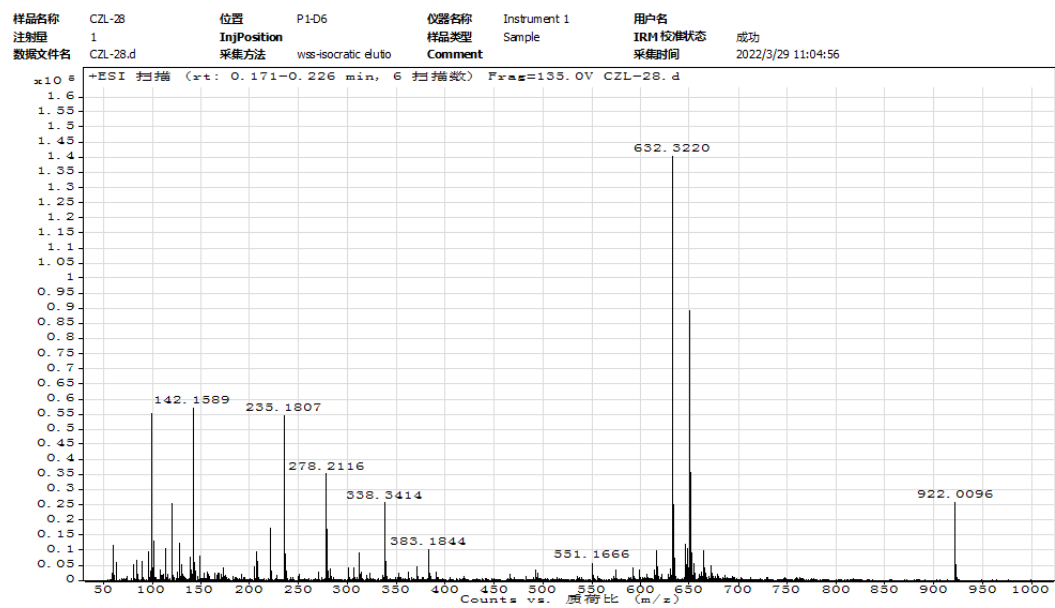

**Figure S22.** The  $^1\text{H}$ -NMR spectrum of compound **4** in  $\text{CDCl}_3$

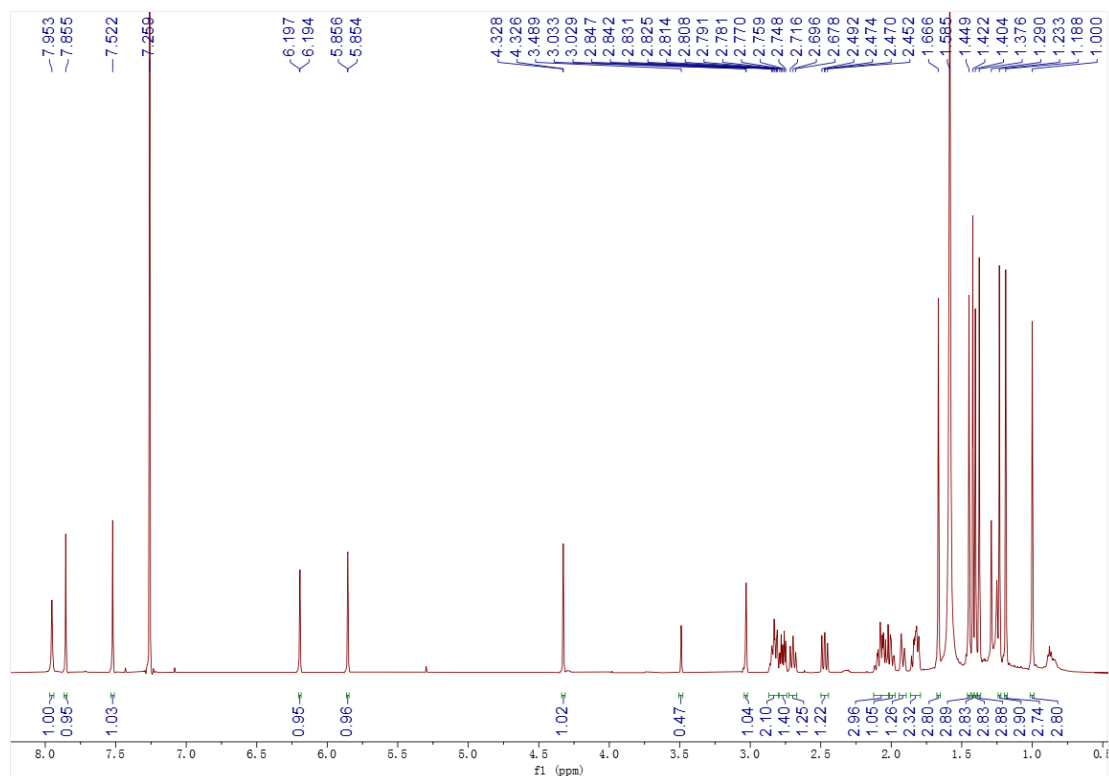

**Figure S23.** The  $^{13}\text{C}$ -NMR spectrum of compound **4** in  $\text{CDCl}_3$

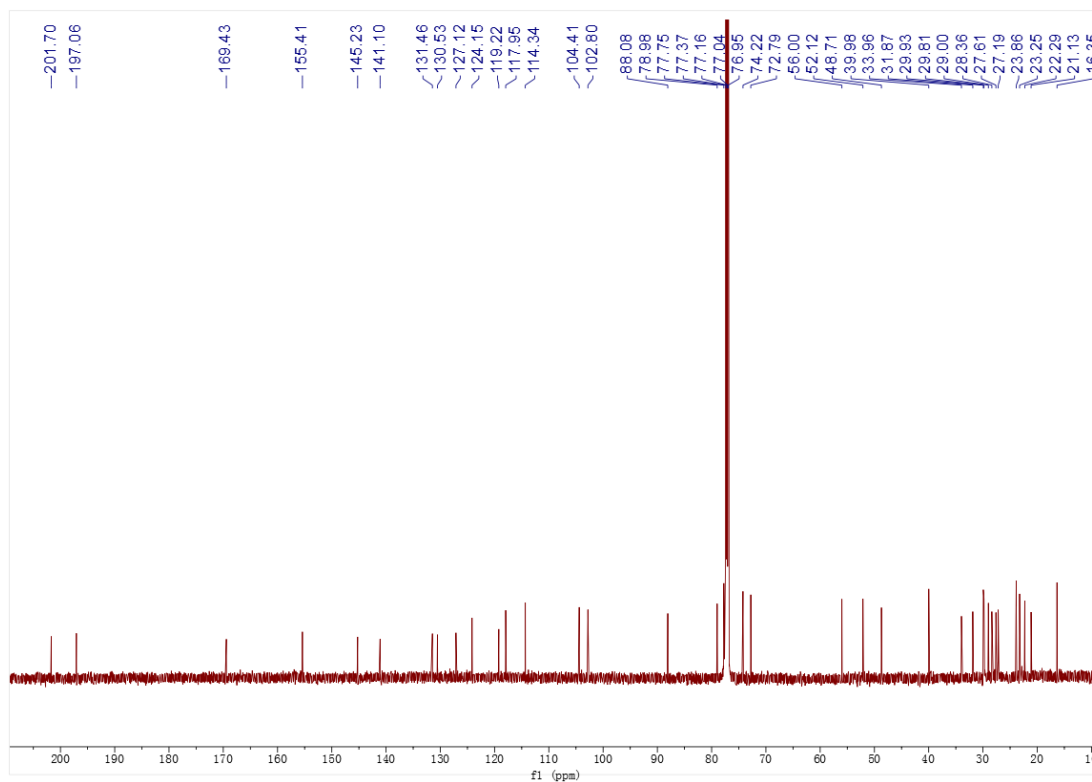

**Figure S24.** The HSQC spectrum of compound **4** in  $\text{CDCl}_3$

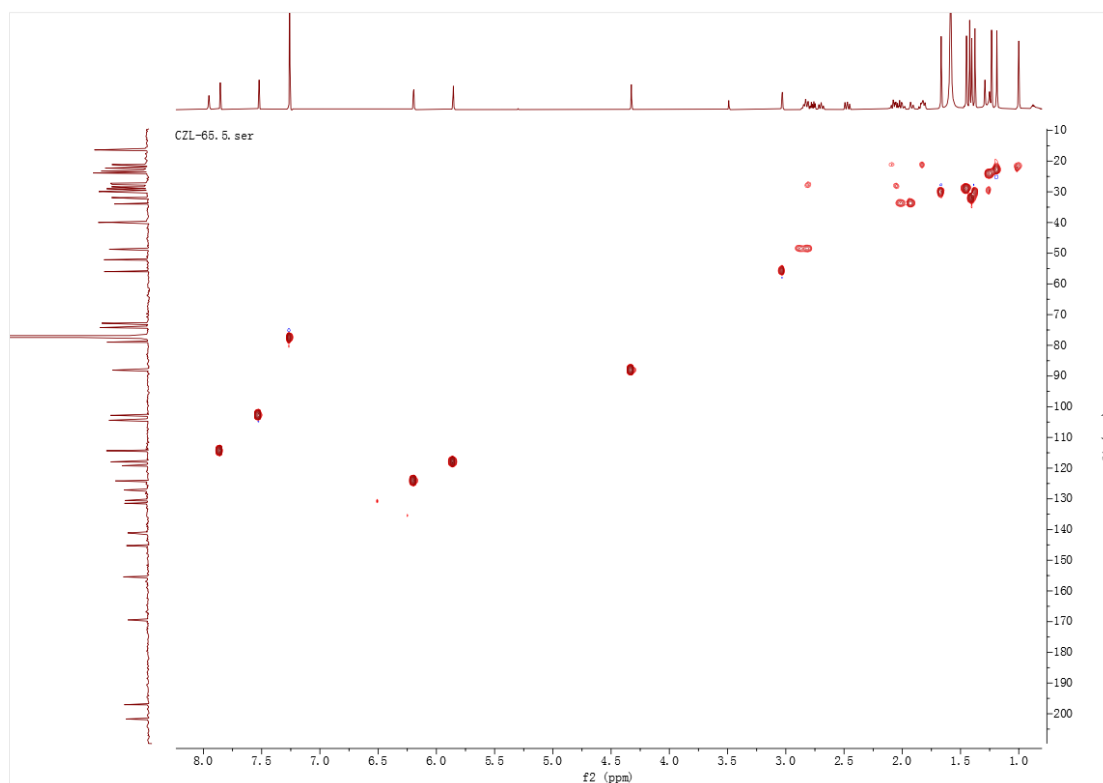

**Figure S25.** The  $^1\text{H}$ - $^1\text{H}$  COSY spectrum of compound **4** in  $\text{CDCl}_3$

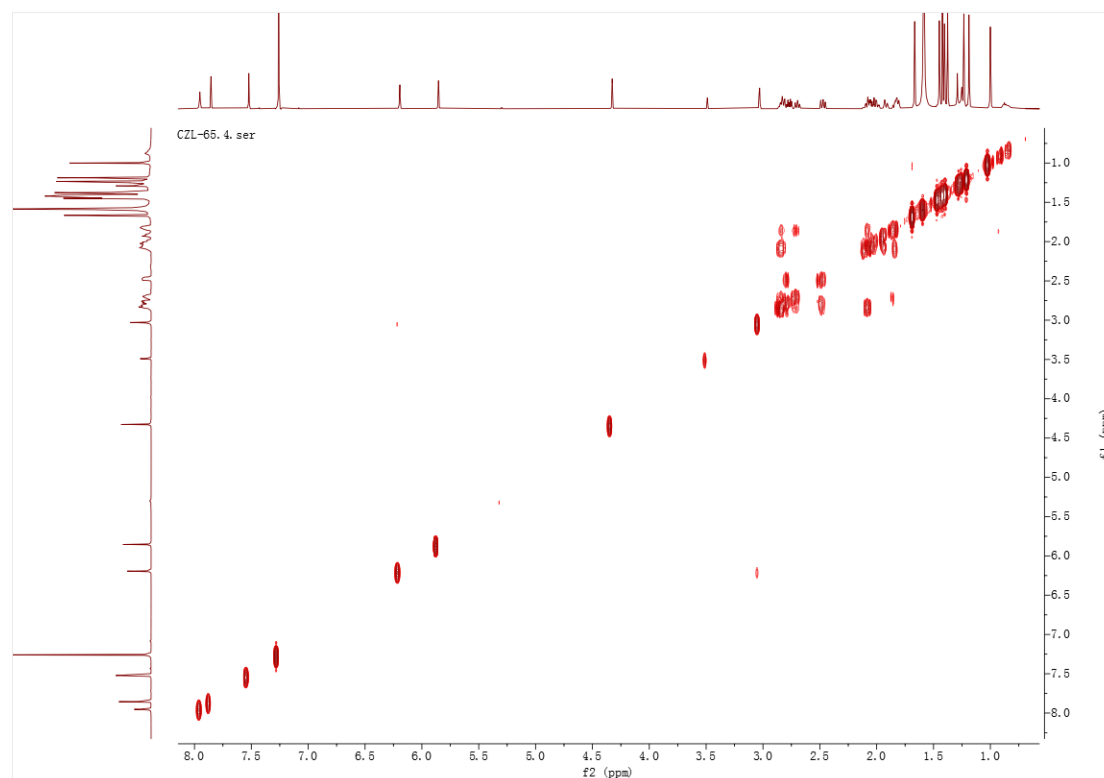

**Figure S26.** The HMBC spectrum of compound **4** in  $\text{CDCl}_3$

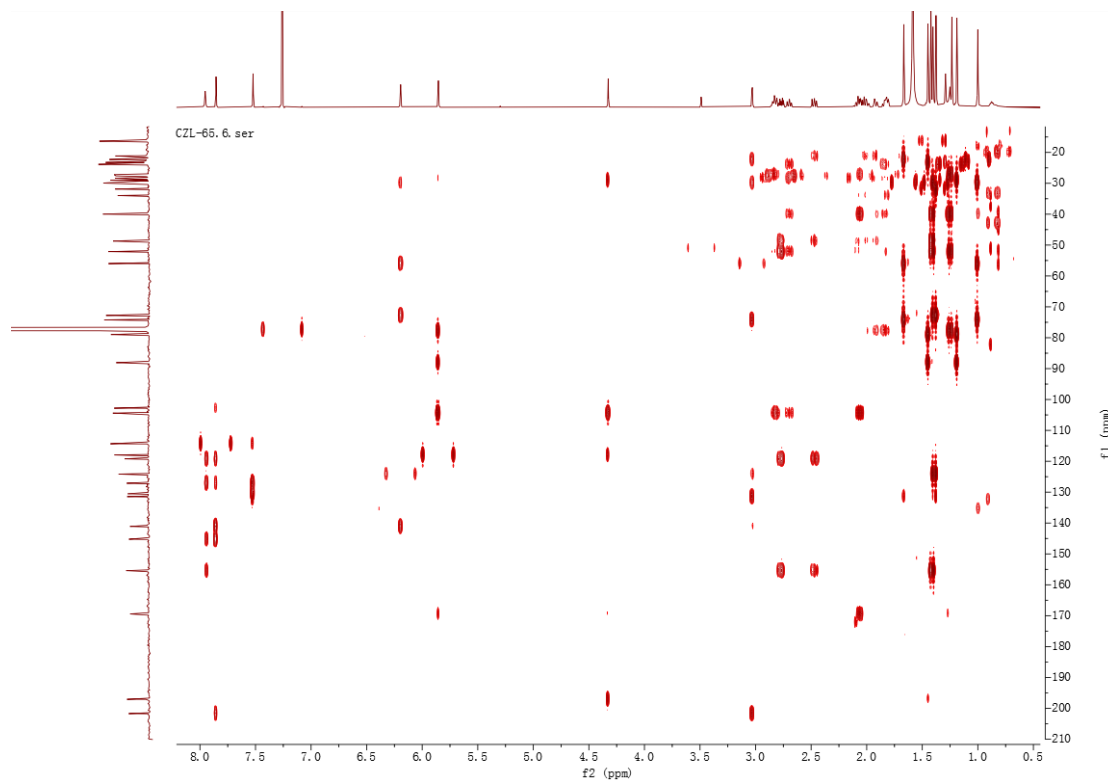

**Figure S27.** The NOESY spectrum of compound **4** in CDCl<sub>3</sub>

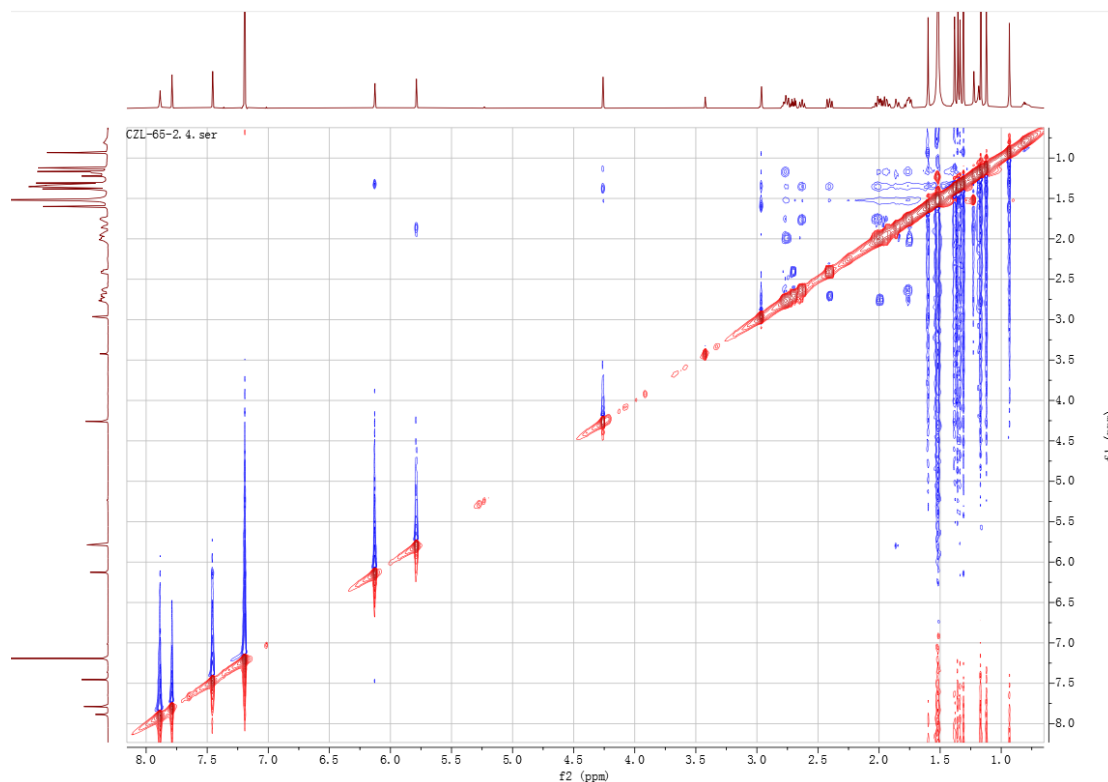

**Figure S28.** The (+)-HR-ESIMS spectrum of compound **4**

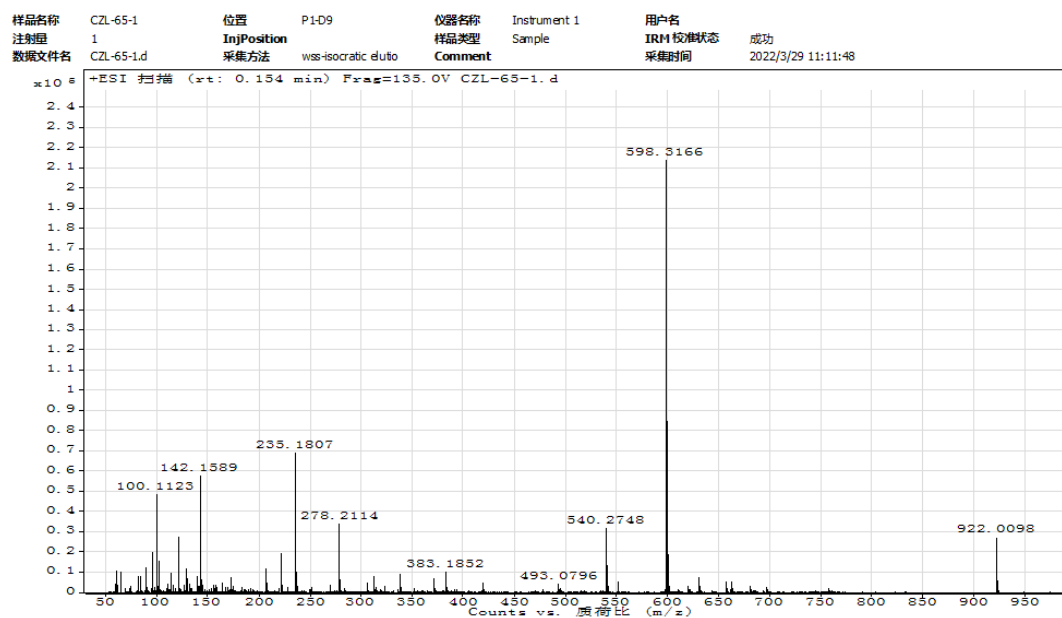

Supplement: s1 [file s1]
